# Supplementary material
Source: PubMed Central journal article supplement (PMC1867919)
Supplement: bmj_334_7601_1003__1.pdf [file bmj_334_7601_1003__1.pdf]

### Web references [posted as supplied by author]

w1 Maier W, Gansicke M, Gater R, et al, Gender differences in the prevalence of depression: a survey in primary care, *Journal of Affective Disorders* (1999) **53**:241-252.

w2 Bonari L, Pinto N, Ahn E et al, Perinatal risks of untreated depression during pregnancy, *Can J Psychiatry* (2004) **49**:726-735.

w3 Lovisi GM, Lopez JR, Coutinho ES, Patel V. Poverty, violence and depression during pregnancy: a survey of mothers attending a public hospital in Brazil. *Psychol Med*. 2005 **35**:1485-92.

w4 Gater R, Tansella M, Korten A, Bea G, Tiemens MA, Mavreas VG, Olatawura MO, Sex Differences in the Prevalence and Detection of Depressive and Anxiety Disorders in General Health Care Settings. Report from the World Health Organization Collaborative Study on Psychological Problems in General Health Care, *Arch Gen Psychiatry* (1998) **55**:405-413.

w5 Viguera AC, Nonacs R, Cohen LS, Tondo L, Aoife Murray AB, Baldessarini RJ, Risk of Recurrence of Bipolar Disorder in Pregnant and Nonpregnant Women After Discontinuing Lithium Maintenance, *American Journal of Psychiatry* (2000) **157**:179-184.

w6 Patel V, Rodrigues M, DeSouza N, Gender, poverty, and postnatal depression: a study of mothers in Goa, India, *Am J Psychiatry* (2002) **159**(1):43-7.

w7 Rich-Edwards J, Krieger N, Majzoub J, Zierler S, Lieberman E, Gillman M, Maternal experiences of racism and violence as predictors of preterm birth: rationale and study design, *Paediatr Perinat Epidemiol* (2001) **15**(Suppl.2):124-135.

w8 Orr ST, Blazer DG, James SA. Racial disparities in elevated prenatal depressive symptoms among black and white women in eastern north Carolina. *Ann Epidemiol*. 2006;**16**:463-8.

w9 Mezey G, Bacchus L, Bewley S, White, S. Domestic violence, lifetime trauma and psychological health of childbearing women. *BJOG* 2005; **11**: 197-204

w10 Shaw M, Lawlor DA, Najman JM. Teenage children of teenage mothers: Psychological, behavioural, and health outcomes from an Australian prospective longitudinal study. *Soc Sci Med* 2006; 62: 2562-39.

w11 O'Keane V. Mood disorder during pregnancy: aetiology and management, in *Psychiatric Disorders in Pregnancy*. P 69-107. Eds, O'Keane V, Marsh M, Seneviratne G. Taylor & Francis: 2006.

w12 Nemeroff CB, The corticotropin-releasing factor (CRF) hypothesis of depression: New findings and new directions, *Mol Psychiatry* (1996) 1:336-342.

w13 Paykel SE: Life events and affective disorder. *Acta Psychtr Scand Suppl* 2003; 418: 61-6

w14 Appleby L, Suicide during pregnancy and in the first postnatal year, *BMJ* (1991) **302**:137-140.

w15 Marsh MS. Depression and labour. In *Psychiatric Disorders and Pregnancy*, O'Keane V, Marsh M & Seneviratne G (ed) pp 47-61. 2006:Taylor & Francis, London.

w16 Nakano Y, Oshima M, Sugiura-Ogasama M, et al. Psychosocial predictors of successful delivery after unexplained recurrent abortions: a cohort study. *Acta Psych Scand* (2004) 109: 440-6

w17 Rahimi R, Nikfar S, Abdollahi M, Pregnancy outcomes following exposure to serotonin reuptake inhibitors: a meta-analysis of clinical trials, *Reprod Toxicol* (2006) **22**(4):571-5.

w18 Berle JO, Mykletun A, Daltveit AK, Rasmussen S, Hosten F, Dahl AA. Neonatal outcomes in offspring of women with anxiety and depression during pregnancy. A linkage study from The Nord-Trøndelag Health Study (HUNT) and Medical Birth Registry of Norway. *Arch Womens Ment Health*. (2005) **8**:181-189.

w19 Nordentoft M, Lou HC, Hansen D et al, Intrauterine growth retardation and premature delivery: the influence of maternal smoking and psychosocial factors, *Am J Public Health* (1996) **86**:347-354.

- w20 Austin M-P, Leader L, Maternal stress and obstetric and infant outcomes: epidemiological findings and neuroendocrine mechanisms, *Aust N Z J Obstet Gynaecol* (2000) **40**:331-337.
- w21 Steer RA, Scholl TO, Hediger ML, Fischer RL, Self-reported depression and negative pregnancy outcomes, *J Clin Epidemiol* (1992) **10**:1093-1099.
- w22 Hansen D, Lou HC, Olsen J, Serious life events and congenital malformations: a national study with complete follow-up, *Lancet* (2000) **356**:875-880.
- w23 O'Connor TG, Heron J, Golding J, Beveridge M, Glover V, Maternal antenatal anxiety and children's behavioural/emotional problems at 4 years, *British Journal of Psychiatry* (2002) **180**:502-508.
- w24 McLean M, Bisits A, Davies J, Woods R, Lowry P, Smith R, A placental clock controlling the length of human pregnancy, *Nat Med* (1995) **1**:460-463.
- w25 Teixeira JMA, Fisk NM, Glover V, Association between maternal anxiety in pregnancy and increased uterine artery resistance index: cohort based study, *BMJ* (1999) **318**:153-157.
- w26 Zuckerman B, Amaro H, Bauchner H, Cabral H, Depressive symptoms during pregnancy: Relationship to poor health behaviors, *Am J Obstet Gynecol* (1989) **160**:1107-1111.
- w27 Einarson TR, Einarson A, Newer antidepressants in pregnancy and rates of major malformations: a meta-analysis of prospective comparative studies, *Pharmacoepidemiol Drug Saf.* (2005) **14**(12):823-7.
- w28 Chambers CD, Hernandez-Diaz S, Marder LJ, Werler MM, Louik C, et al, Selective serotonin-reuptake inhibitors and risk of persistent pulmonary hypertension of the newborn, *The New England Journal of Medicine*, (2006) **354**:579-587.
- w29 Sanz EJ, De-las-Cuevas C, Kiuru A, Bate A, Edwards R. Selective serotonin reuptake inhibitors in pregnant women and neonatal withdrawal syndrome: a database analysis. *Lancet* (2005) **365**:482-87.

w30 Moses-Kolko EL, Bogen D, Perel J, Bregar A, Uhl K, Levin B, Wisner KL, Neonatal signs after late in utero exposure to serotonin reuptake inhibitors: literature review and implications for clinical applications, *JAMA* (2005) **293**(19):2372-83.

w31 Yonkers KA, Wisner KL, Stowe Z, Leibenluft E, Cohen L, Miller L, Manber R, Viguera A, Suppes T, Altshuler L, Management of bipolar disorder during pregnancy and the postpartum period, *Am J Psychiatry* (2004) **161**:608-620.

w32 Wisner KL, Gelenberg AJ, Leonard H, Zarin D, Frank E, Pharmacologic treatment of depression during pregnancy, *JAMA* (1999) **282**:1264-1267.

w33 Austin MP. To treat or not to treat: maternal depression, SSRI use in pregnancy and adverse neonatal effects. *Psychol Med* (2006) 25:1-8.
